# Supplementary material for: Plasmon-enhanced reverse water gas shift reaction over oxide supported Au catalysts
Source: Royal Society of Chemistry journal article supplement (doi:10.1039/c4cy01183j), 2014-11-04
Supplement: c4cy01183j1.pdf [file c4cy01183j1.pdf]

**Supplementary Information:**

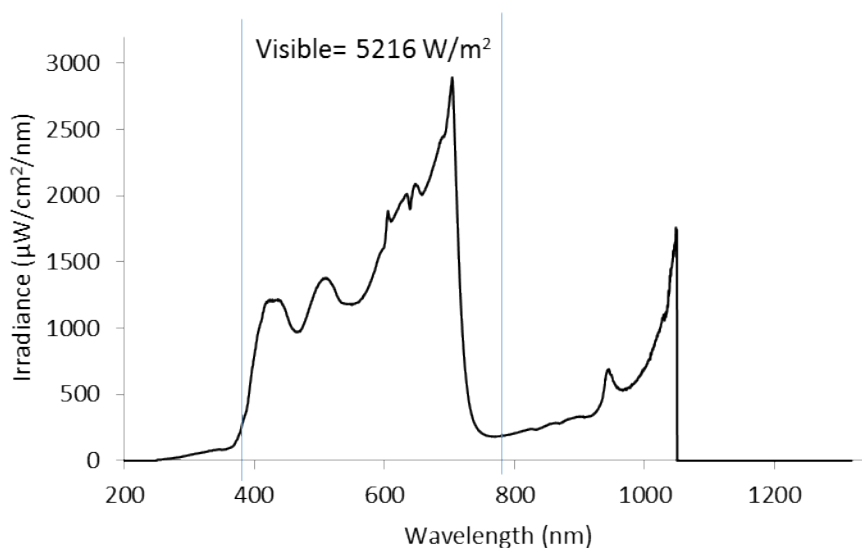

**Figure S1.** Spectral distribution of the light source used for plasmon enhanced reduction of CO<sub>2</sub> through reverse water gas shift reaction

**Table S1.** Criteria for showing absence of mass and heat transfer limitations in plasmon-enhanced RWGS reaction over Au/TiO<sub>2</sub> (DP) catalyst

|                           | Criterion                                                                                                          | Computed value        | Controlling Regime     | Ref.             |
|---------------------------|--------------------------------------------------------------------------------------------------------------------|-----------------------|------------------------|------------------|
| <b>Interphase heat</b>    | $\frac{ \Delta H  r_p''' r_p^2}{h T_b} < 0.15 \frac{RT_b}{E}$                                                      | $1.5 \times 10^{-8}$  | $> 1.3 \times 10^{-2}$ | Ref <sup>1</sup> |
| <b>Interparticle heat</b> | $\frac{ \Delta H  r_p''' r_p^2}{k_e T_w} < 0.4 \frac{RT_w/E}{\left[1 + 8\left(\frac{r_p}{R_o}\right) Bi_w\right]}$ | $1.3 \times 10^{-8}$  | $> 3.0 \times 10^{-2}$ | Ref <sup>1</sup> |
| <b>Intraparticle heat</b> | $\frac{ \Delta H  r_p''' r_p^2}{h T_s} < \frac{0.75 RT_s}{E}$                                                      | $1.3 \times 10^{-8}$  | $> 6.3 \times 10^{-2}$ | Ref <sup>2</sup> |
| <b>Intraparticle mass</b> | $\frac{r_p''' r_p^2}{C_s D_e} < 0.3$                                                                               | $5.2 \times 10^{-6}$  | $> 3.0 \times 10^{-1}$ | Ref <sup>3</sup> |
| <b>Interphase mass</b>    | $\frac{r_p''' r_p^2}{C_s k_c} < \frac{0.15}{n}$                                                                    | $3.4 \times 10^{-10}$ | $> 3.0 \times 10^{-1}$ | Ref <sup>4</sup> |

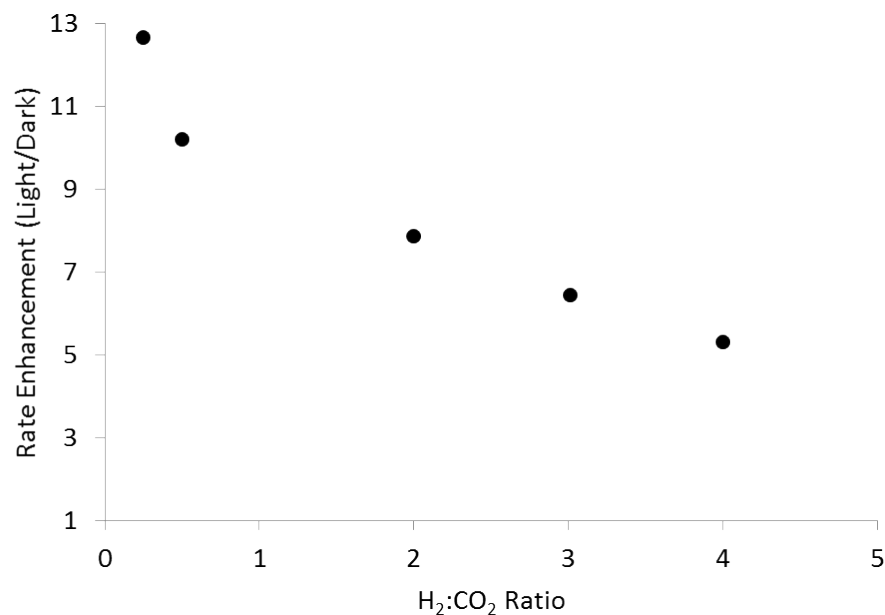

**Figure S2.** Dependence of rate enhancement (ratio of light to dark reaction rates) on H<sub>2</sub>:CO<sub>2</sub> ratio in plasmon enhanced reverse water gas shift reaction over Au/TiO<sub>2</sub> catalyst. Experimental conditions: P= 103 psia, T=200 °C, Total gas flow rate= 15 sccm, catalyst amount= 7.9 mg.

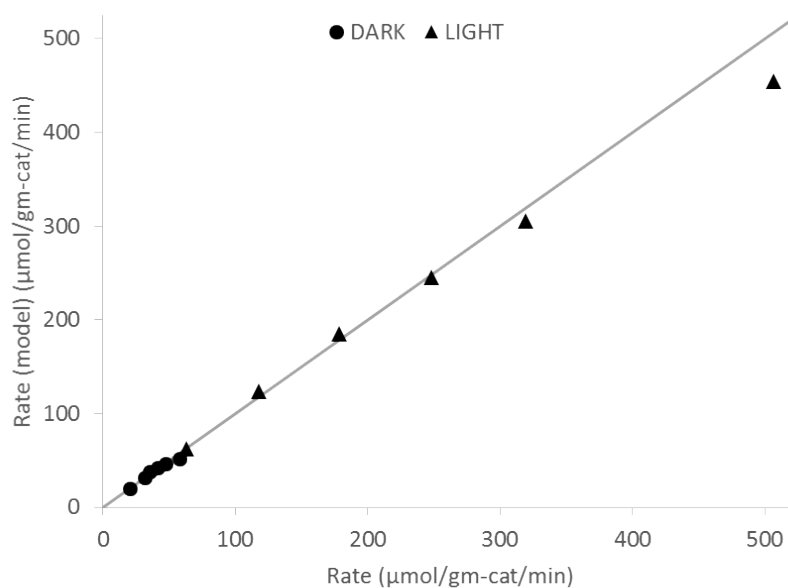

**Figure S3.** Model results against the experimental values for fitting the experimental data of rate dependence of RWGS reaction on CO<sub>2</sub> partial pressure with Equation 9

#### Nomenclature

$\Delta H$ : Heat of reaction

$Bi_w$ : Biot number at the wall

$C_s$ : Concentration of reactant at the external surface of the catalyst particle

$D_e$ : Effective diffusivity

$E$ : Activation energy of the reaction

$h$ : Heat transfer coefficient

$K_c$ : Mass-transfer coefficient between the catalyst and bulk phases

$n$ : Reaction order

$r'''$ : Reaction rate per catalyst volume

$R$ : Universal gas constant

$R_o$ : Outer radius of reactor

$r_p$ : Catalyst particle radius

$T_b$ : Temperature of bulk phase

$T_s$ : Catalyst surface temperature

$T_w$ : Reactor wall temperature

### References:

1. D. E. Mears, *J. Catal.*, 1971, 20, 127-131.
2. J. B. Anderson, *Aiche J.*, 1962, 18, 147-148.
3. P. B. Weisz and C. D. Prater, in *Advances in Catalysis*, eds. V. I. K. W.G. Frankenburg and E. K. Rideal, Academic Press, 1954, vol. Volume 6, pp. 143-196.
4. D. E. Mears, *Industrial & Engineering Chemistry Process Design and Development*, 1971, 10, 541-547.
